# Supplementary material for: Exploring the amplied role of HCHO during the wintertime ozone and PM 2.5 pollution in a coastal city of southeast China
Source: Copernicus journal article supplement (doi:10.5194/egusphere-2023-1242), 2023-07-07
Supplement: Supplementary file 1 [file egusphere-2023-1242-supplement.pdf]

# Exploring the amplified role of HCHO during the wintertime ozone and PM<sub>2.5</sub> pollution in a coastal city of southeast China

Youwei Hong<sup>a,b,c,d,g\*</sup>, Keran Zhang<sup>a,b,d</sup>, Dan Liao<sup>f</sup>, Gaojie Chen<sup>a,b,c</sup>, Min Zhao<sup>i</sup>, Yiling Lin<sup>a,b,e</sup>, Xiaoting Ji<sup>a,b,c</sup>, Ke Xu<sup>a,b,g</sup>, Yu Wu<sup>a,b,e</sup>, Ruilian Yu<sup>e</sup>, Gongren Hu<sup>e</sup>, Sung-Deuk Choi<sup>h</sup>, Likun Xue<sup>i\*</sup>, Jinsheng Chen<sup>a,b,c</sup>

<sup>a</sup>Center for Excellence in Regional Atmospheric Environment, Key Lab of Urban Environment and Health, Institute of Urban Environment, Chinese Academy of Sciences, Xiamen, 361021, China

<sup>b</sup>Fujian Key Laboratory of Atmospheric Ozone Pollution Prevention, Institute of Urban Environment, Chinese Academy of Sciences, Xiamen, 361021, China

<sup>c</sup>University of Chinese Academy of Sciences, Beijing, 100049, China

<sup>d</sup>College of Resources and Environment, Fujian Agriculture and Forest University, Fuzhou 350002, China

<sup>e</sup>College of Chemical Engineering, Huaqiao University, Xiamen, 361021, China

<sup>f</sup>College of Environment and Public Health, Xiamen Huaxia University, Xiamen 361024, China

<sup>g</sup>School of Life Sciences, Hebei University, Baoding, 071000, China

<sup>h</sup>Department of Urban and Environmental Engineering, Ulsan National Institute of Science and Technology, Ulsan, 44919, South Korea

<sup>i</sup>Environment Research Institute, Shandong University, Qingdao, 266237, China

\*Corresponding author E-mail: Youwei Hong (ywhong@iue.ac.cn); Likun Xue (xuelikun@sdu.edu.cn)

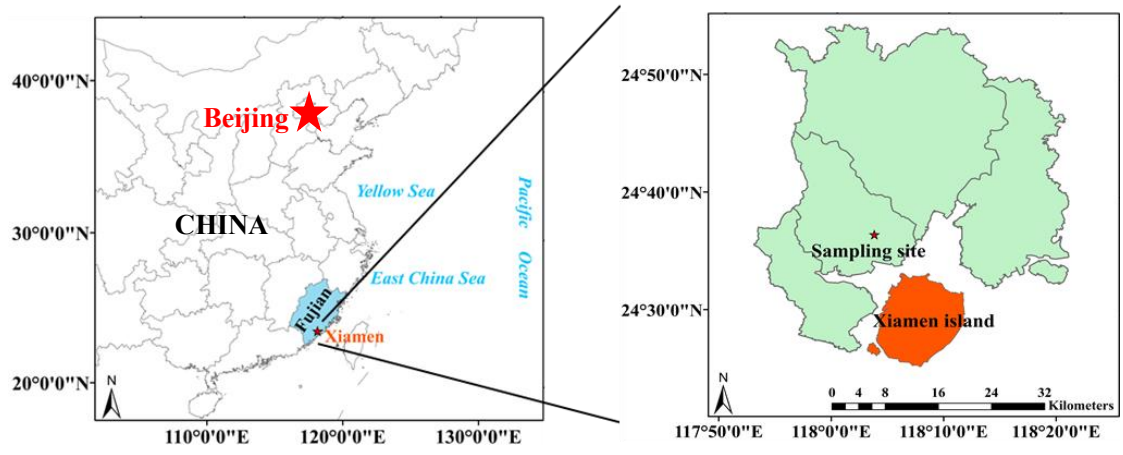

Fig S1. Location of the observation site in a coastal city of Southeast China

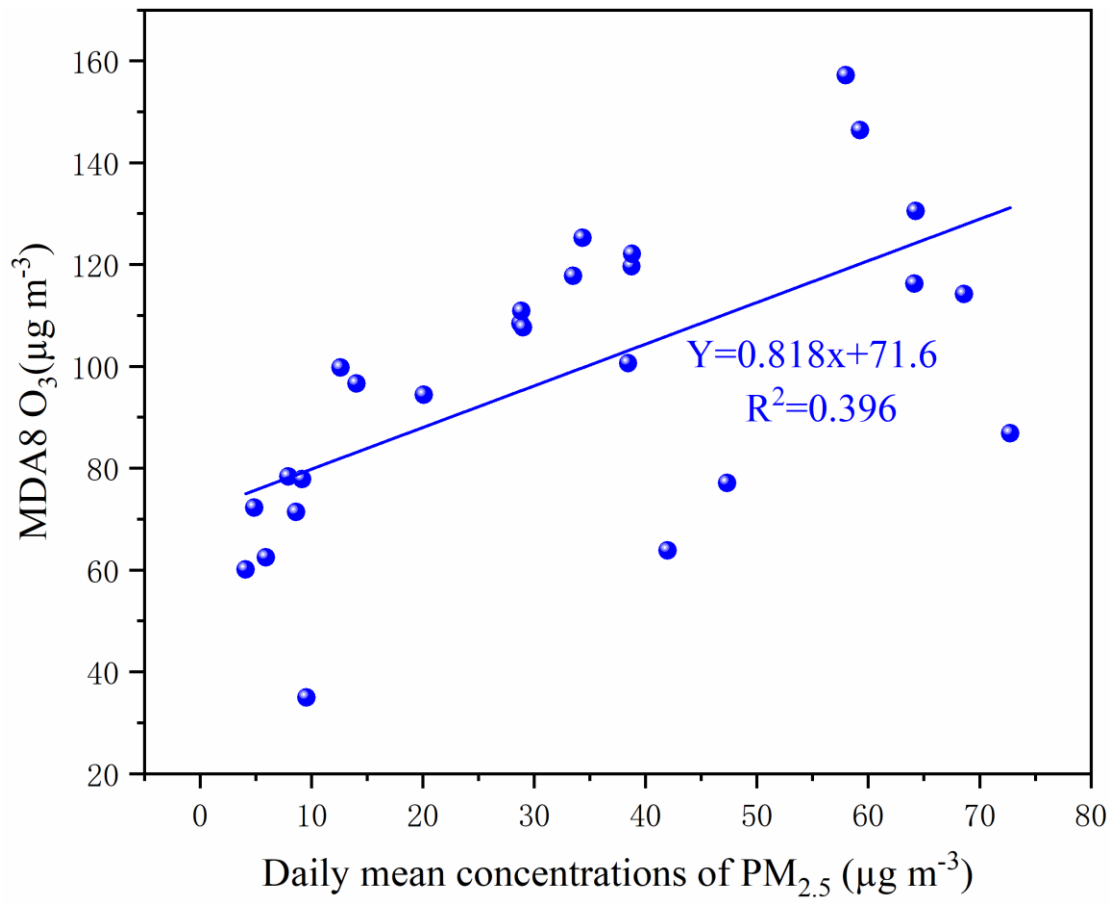

**Fig S2. The correlation of PM<sub>2.5</sub> and MDA8 O<sub>3</sub> concentrations during the whole periods**

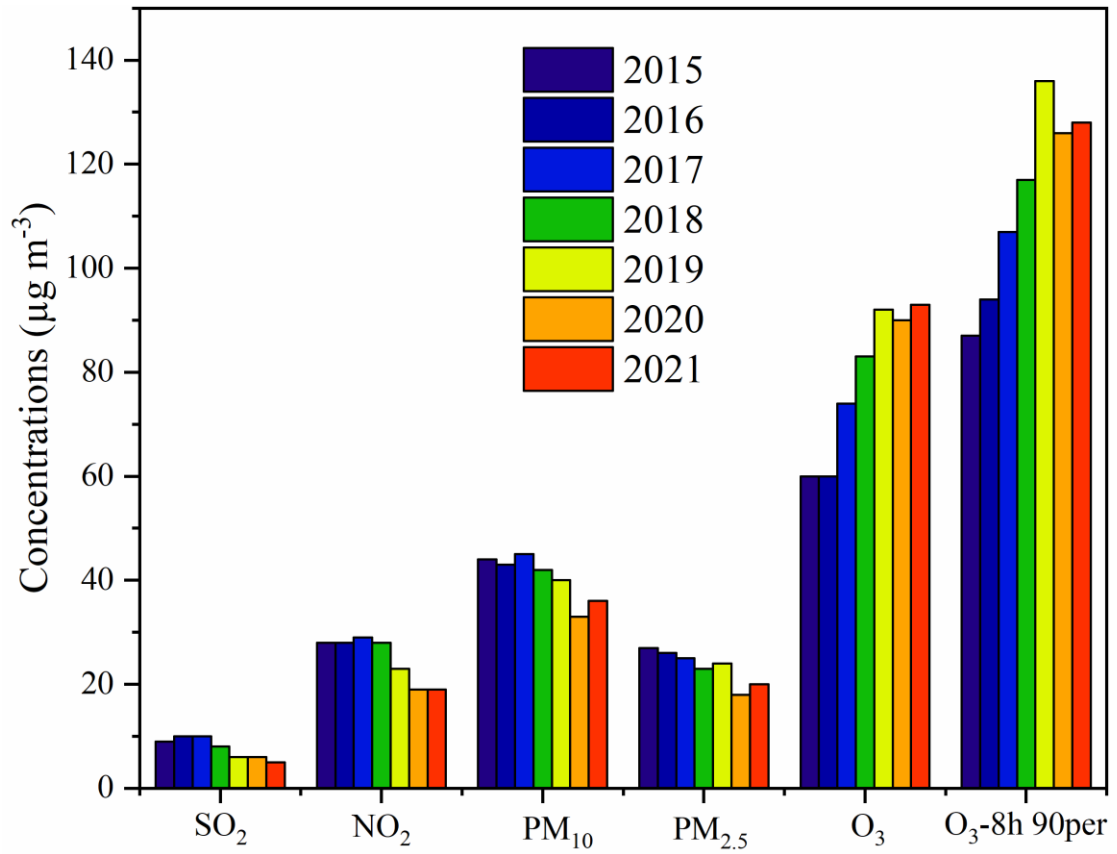

**Fig S3. Inter-annual mean concentrations of criteria air pollutants in Xiamen, a coastal city of Southeast China**

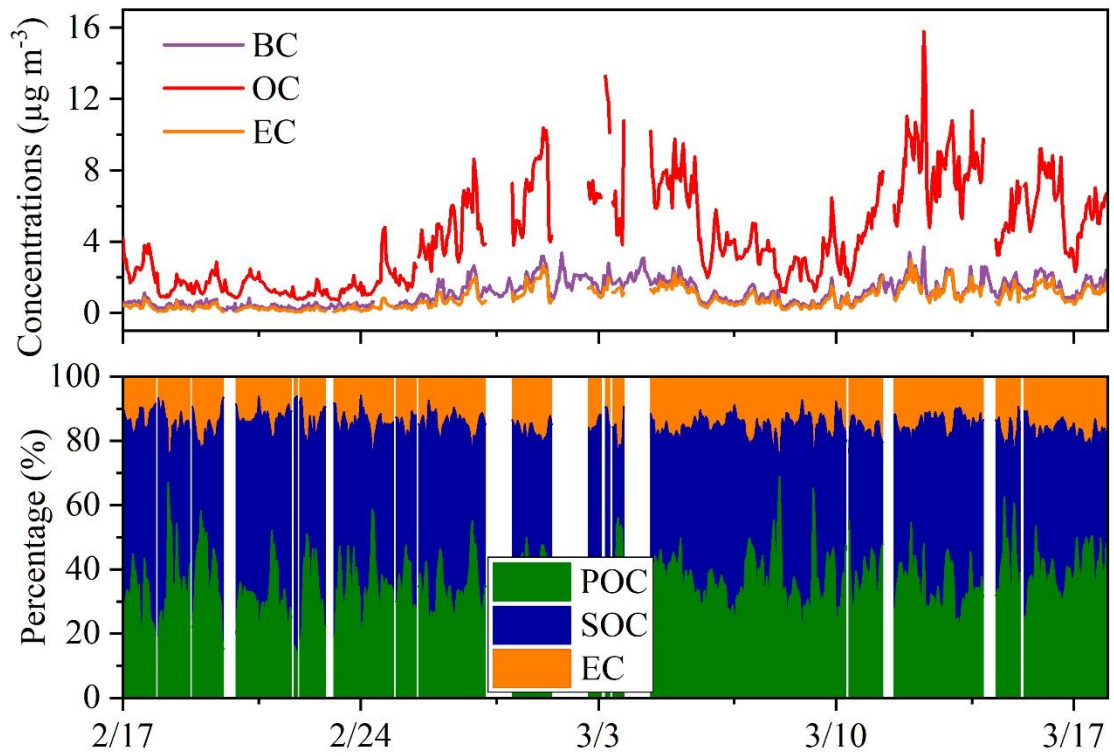

**Fig S4.** The concentrations and percentages of OC, EC, and BC during the whole periods

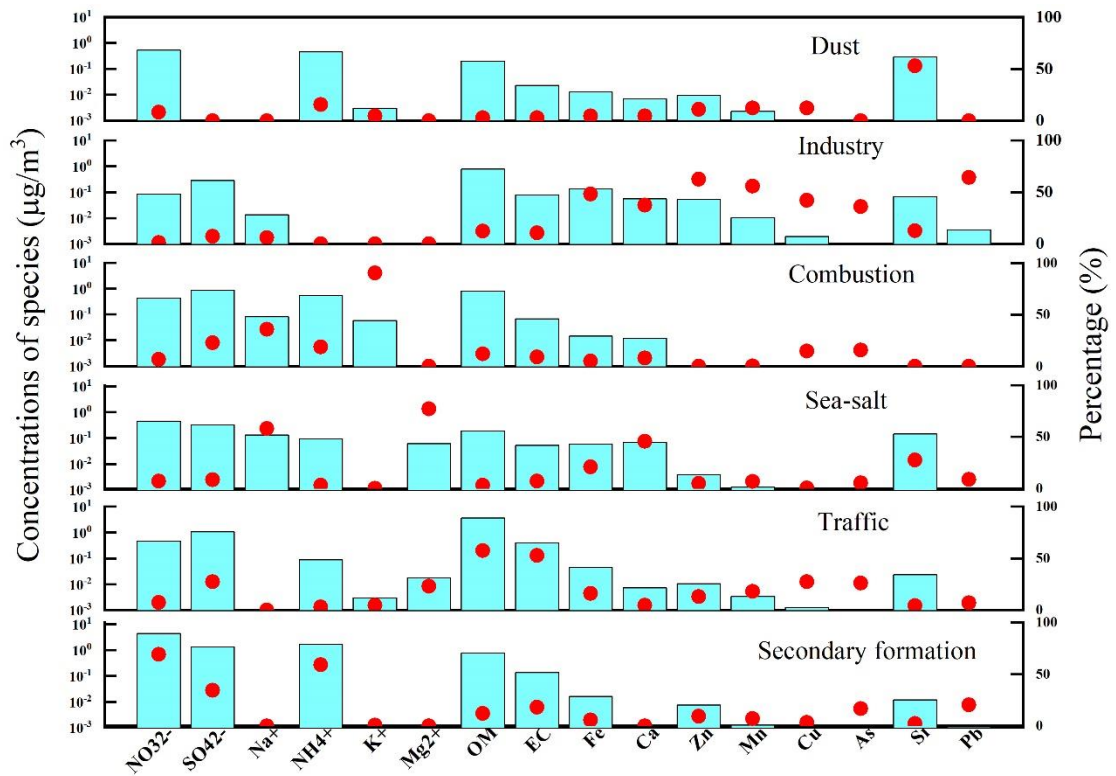

**Fig S5.** The factor profiles and the contribution of various sources to PM<sub>2.5</sub> by the positive matrix factorization (PMF) model analysis. The bars represent the concentrations of various species and the dots represent the contributions of species to the factors.

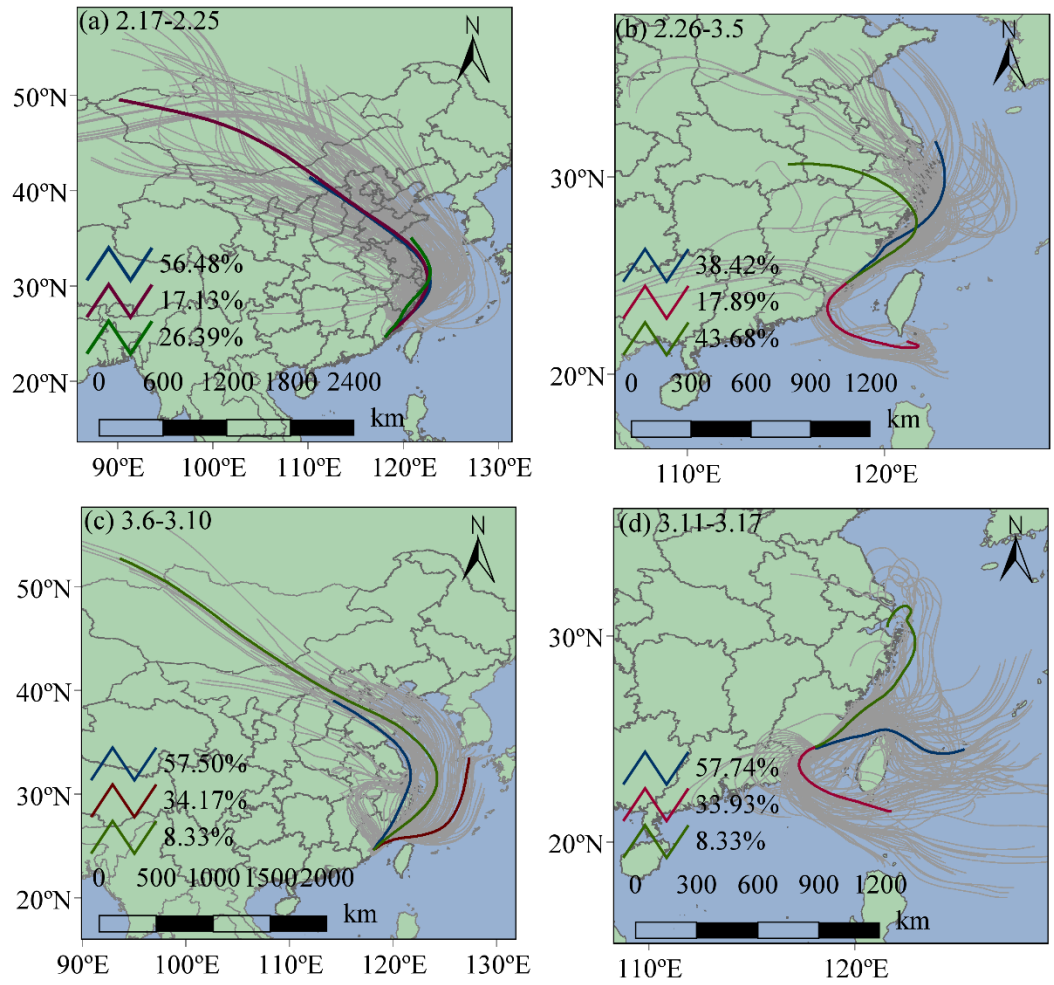

**Fig.S6 Backward trajectory clusters at the monitoring site under different periods**

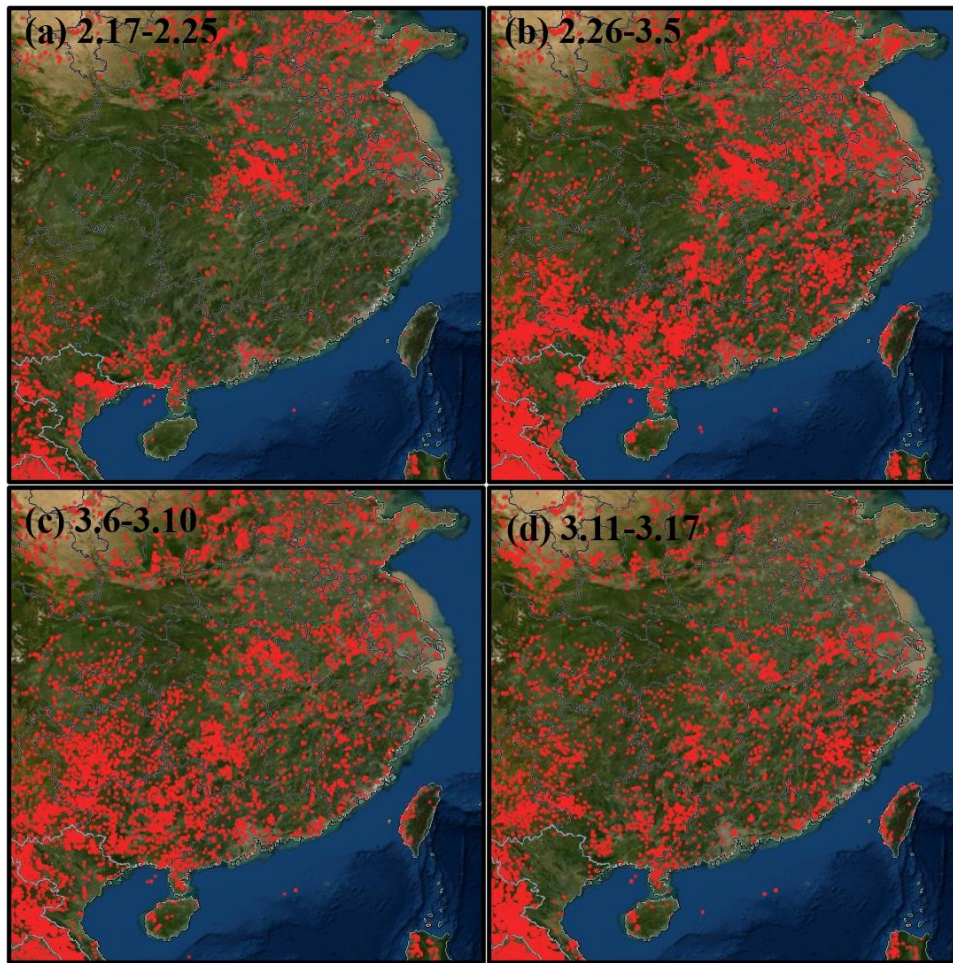

**Fig.S7 The distribution of fire spots around the monitoring site under different periods (From the Fire Information for Resource Management System, <https://firms.modaps.eosdis.nasa.gov/firemap/>)**



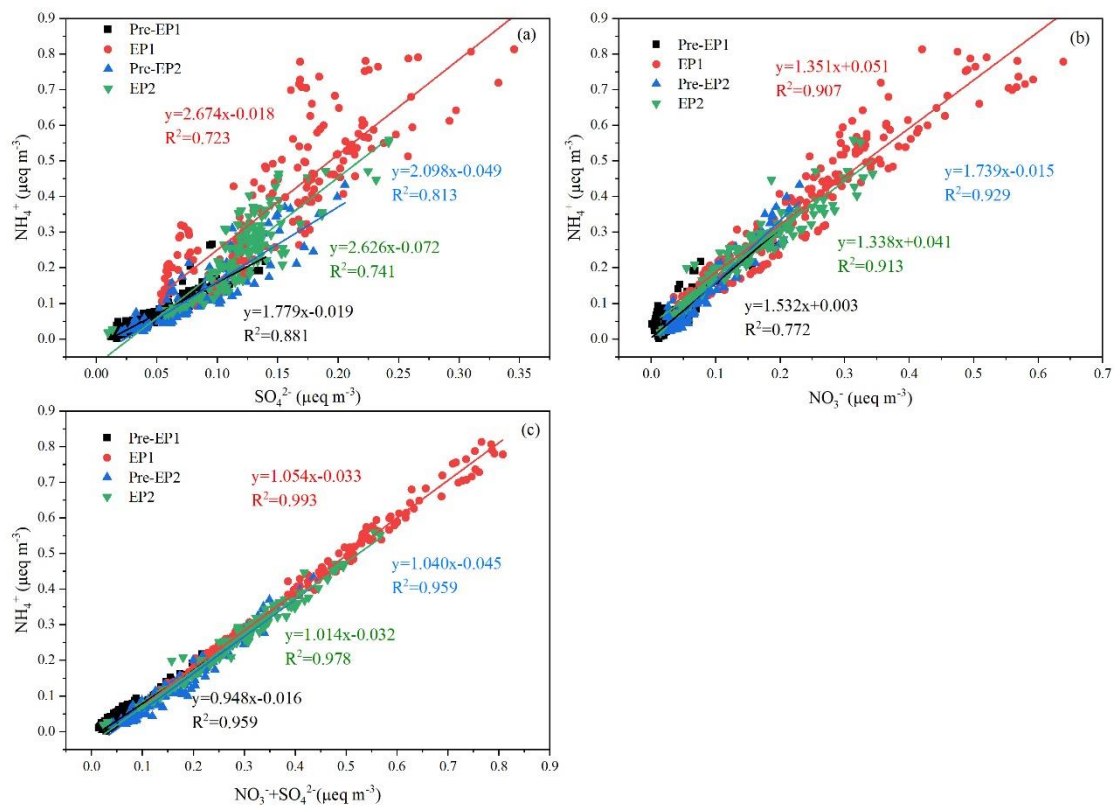

**Fig S8.** The correlations between (a)  $\text{NH}_4^+$  and  $\text{SO}_4^{2-}$ , (b)  $\text{NH}_4^+$  and  $\text{NO}_3^-$ , and (c)  $\text{NH}_4^+$  and  $\text{NO}_3^- + \text{SO}_4^{2-}$

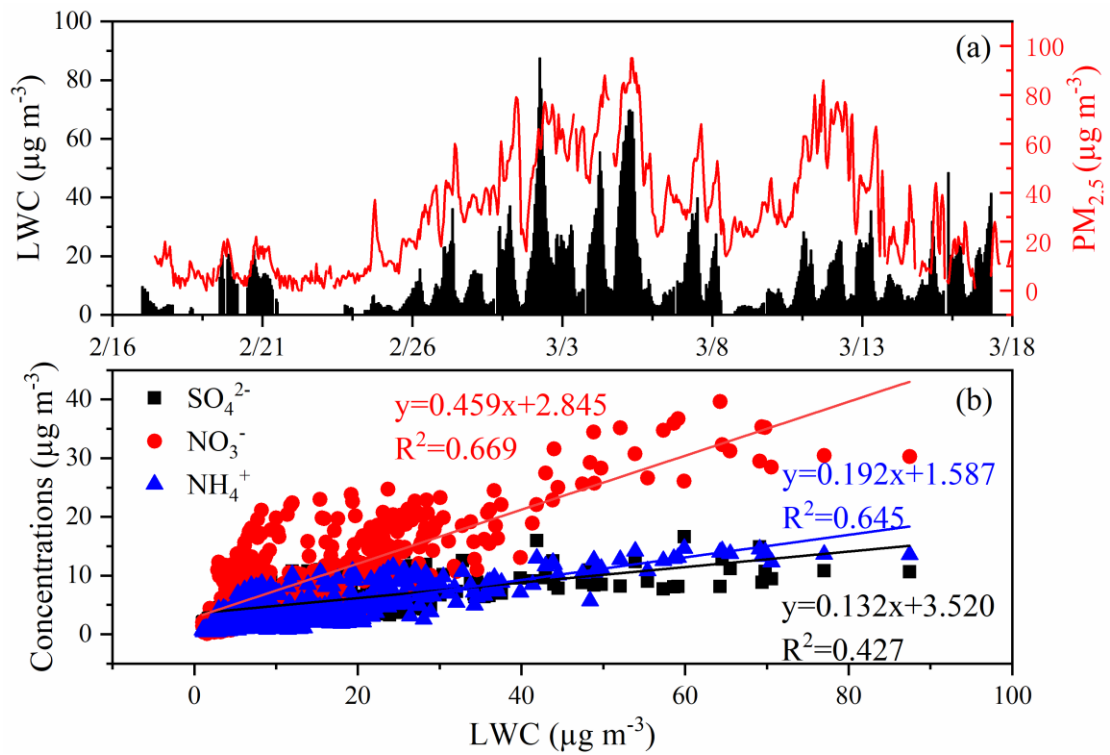

**Fig S9.** The correlations between liquid water content (LWC) of aerosols and concentrations of secondary inorganic aerosol (SIA, including  $\text{SO}_4^{2-}$ ,  $\text{NO}_3^-$  and  $\text{NH}_4^+$ )

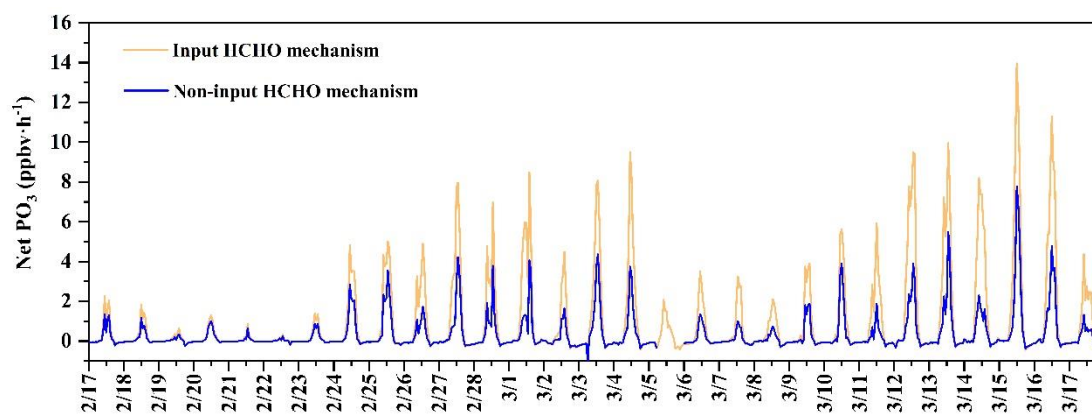

**Fig S10. The net O<sub>3</sub> production rates modeled by the OBM with or without HCHO mechanism**

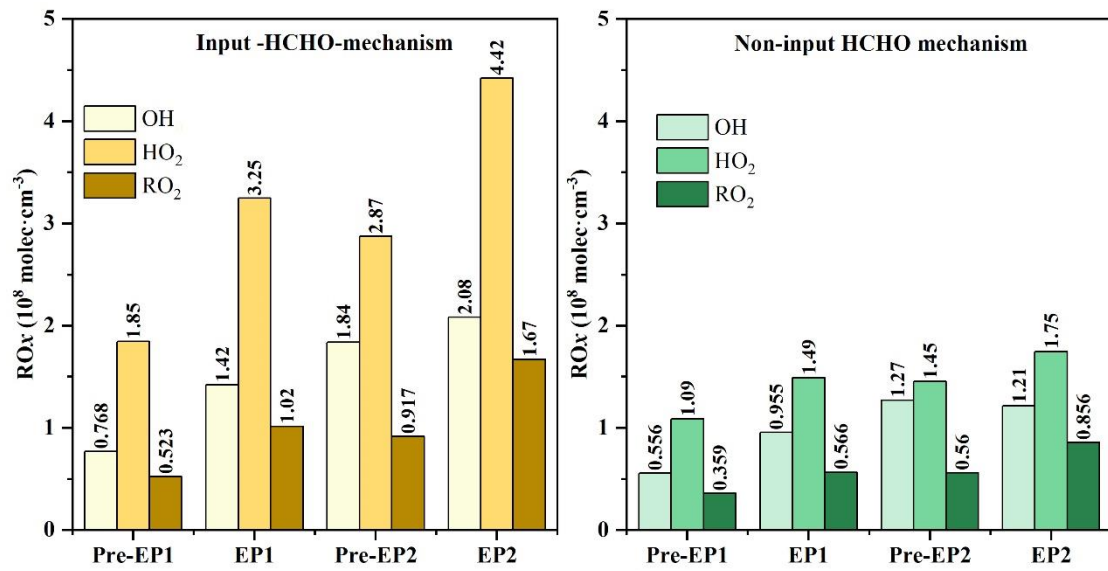

Fig S11. The ROx concentrations modeled by the OBM with or without HCHO mechanism

Table S1 Mean concentrations of air pollutants, chemical compositions and meteorological parameters under different pollution stages

|                                                        | Pre-EP1      | EP1           | Pre-EP2      | EP2          |
|--------------------------------------------------------|--------------|---------------|--------------|--------------|
| PM <sub>2.5</sub> ( $\mu\text{g m}^{-3}$ )             | 9.03±6.28    | 51.94±19.02   | 33.53±10.41  | 35.34±23.51  |
| PM <sub>10</sub> ( $\mu\text{g m}^{-3}$ )              | 13.68±10.51  | 74.43±24.40   | 57.46±21.11  | 58.21±28.98  |
| O <sub>3</sub> ( $\mu\text{g m}^{-3}$ )                | 60.82±18.57  | 67.12±44.73   | 76.58±31.83  | 58.98±47.97  |
| CO( $\mu\text{g m}^{-3}$ )                             | 531.02±63.18 | 742.86±121.34 | 379.17±95.65 | 577.98±97.24 |
| SO <sub>2</sub> ( $\mu\text{g m}^{-3}$ )               | 9.16±3.47    | 13.74±7.61    | 16.26±2.68   | 18.20±6.58   |
| NO <sub>2</sub> ( $\mu\text{g m}^{-3}$ )               | 12.40±7.00   | 31.38±14.20   | 22.01±10.82  | 32.56±11.08  |
| NO( $\mu\text{g m}^{-3}$ )                             | 1.5±1.31     | 5.56±9.51     | 2.04±14.29   | 6.13±8.02    |
| Ox( $\mu\text{g m}^{-3}$ )                             | 73.22±12.78  | 98.50±29.45   | 88.59±21.32  | 91.54±29.57  |
| BC( $\mu\text{g m}^{-3}$ )                             | 0.45±0.19    | 1.69±0.56     | 0.78±0.32    | 1.61±0.54    |
| OC( $\mu\text{g m}^{-3}$ )                             | 1.69±0.81    | 6.36±2.16     | 3.20±1.52    | 7.48±5.03    |
| EC( $\mu\text{g m}^{-3}$ )                             | 0.27±0.17    | 1.23±0.50     | 0.59±1.51    | 1.29±0.51    |
| SO <sub>4</sub> <sup>2-</sup> ( $\mu\text{g m}^{-3}$ ) | 1.96±1.26    | 7.07±2.91     | 3.87±2.24    | 5.87±1.70    |
| NO <sub>3</sub> <sup>-</sup> ( $\mu\text{g m}^{-3}$ )  | 2.02±1.81    | 14.95±8.34    | 4.83±2.83    | 9.69±4.89    |
| NH <sub>4</sub> <sup>+</sup> ( $\mu\text{g m}^{-3}$ )  | 0.96±0.90    | 6.77±3.43     | 2.16±1.63    | 4.46±1.88    |
| NOR                                                    | 0.16±0.07    | 0.32±0.08     | 0.18±0.06    | 0.24±0.05    |
| SOR                                                    | 0.19±0.07    | 0.38±0.18     | 0.19±0.06    | 0.26±0.08    |
| T(°C)                                                  | 12.38±3.89   | 20.56±3.90    | 18.65±4.17   | 23.93±4.30   |
| RH(%)                                                  | 69.41±12.45  | 63.17±10.32   | 54.30±15.52  | 62.17±11.05  |
| P(kPa)                                                 | 101.14±0.36  | 100.71±0.30   | 100.68±0.15  | 100.17±0.21  |
| WS(m/s)                                                | 1.64±0.70    | 1.02±0.51     | 1.37±0.59    | 0.93±0.54    |
| UV(W/m <sup>2</sup> )                                  | 5.88±9.58    | 9.31±13.94    | 11.08±16.09  | 11.10±15.05  |
| JNO <sub>2</sub> ( $\times 10^{-3} \text{ s}^{-1}$ )   | 1.50±2.45    | 2.49±3.57     | 2.91±3.94    | 2.95±3.79    |
| HONO( $\mu\text{g m}^{-3}$ )                           | 0.75±0.36    | 3.10±2.25     | 1.19±0.58    | 4.19±2.68    |
| HCHO(ppb)                                              | 0.68±0.71    | 2.94±1.01     | 1.59±0.71    | 3.59±1.36    |
| TVOCs(ppb)                                             | 14.47±7.14   | 29.39±11.65   | 14.28±6.18   | 29.91±12.05  |

|                      |           |            |           |            |
|----------------------|-----------|------------|-----------|------------|
| Aromatics(ppb)       | 1.29±1.36 | 3.21±1.92  | 1.54±1.29 | 3.06±1.87  |
| Alkynes(ppb)         | 0.78±0.41 | 1.04±1.00  | 0.12±0.06 | 0.77±0.72  |
| Alkanes(ppb)         | 6.48±2.06 | 10.27±5.07 | 4.46±1.92 | 9.73±4.46  |
| Alkenes(ppb)         | 0.75±0.52 | 1.28±0.84  | 0.49±0.42 | 1.37±1.09  |
| OVOCs(ppb)           | 0.87±0.35 | 1.21±0.23  | 1.01±0.41 | 1.22±0.25  |
| Halohydrocarbon(ppb) | 4.30±3.69 | 12.40±4.77 | 6.65±3.03 | 13.76±5.76 |

---
